# Supplementary material for: Label-free imaging of amyloid plaques in Alzheimer’s disease with stimulated Raman scattering microscopy
Source: PubMed Central journal article supplement — Sci Adv. 2018 Nov 16;4(11):eaat7715. doi: 10.1126/sciadv.aat7715 (PMC6239428; doi:10.1126/sciadv.aat7715), 2018-11-16
Supplement: aat7715_SM.pdf [file aat7715_SM.pdf]

## Supplementary Materials for

### **Label-free imaging of amyloid plaques in Alzheimer's disease with stimulated Raman scattering microscopy**

Minbiao Ji\*, Michal Arbel, Lili Zhang, Christian W. Freudiger, Steven S. Hou, Dongdong Lin, Xinju Yang, Brian J. Bacskaï\*, X. Sunney Xie\*

\*Corresponding author. Email: [xie@chemistry.harvard.edu](mailto:xie@chemistry.harvard.edu) (X.S.X.); [bbacskaï@partners.org](mailto:bbacskaï@partners.org) (B.J.B.); [minbiaoj@fudan.edu.cn](mailto:minbiaoj@fudan.edu.cn) (M.J.)

Published 16 November 2018, *Sci. Adv.* **4**, eaat7715 (2018)  
DOI: 10.1126/sciadv.aat7715

#### **This PDF file includes:**

- Fig. S1. Spontaneous Raman spectra of A $\beta$  in the CH stretching region.
- Fig. S2. SRS images of a fixed AD brain section.
- Fig. S3. More SRS images of SPs in fresh brain tissues.
- Fig. S4. Lipid/protein analysis of the plaque and surrounding tissue.

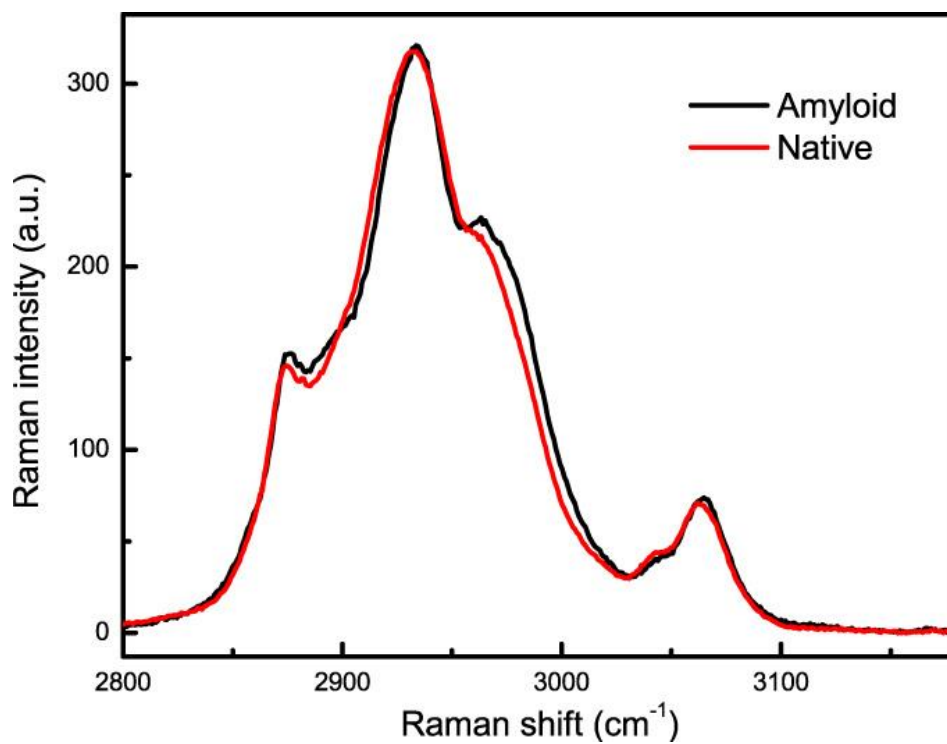

**Fig. S1. Spontaneous Raman spectra of A $\beta$  in the CH stretching region.**

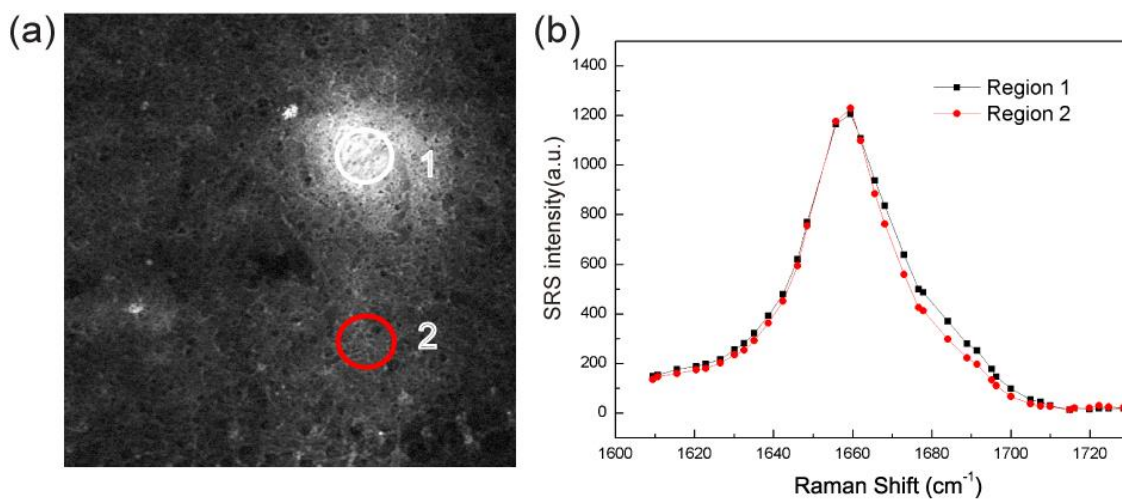

**Fig. S2. SRS images of a fixed AD brain section. (A)** SRS image including an amyloid plaque. **(B)** SRS spectra of the amyloid and normal tissue regions look similar.

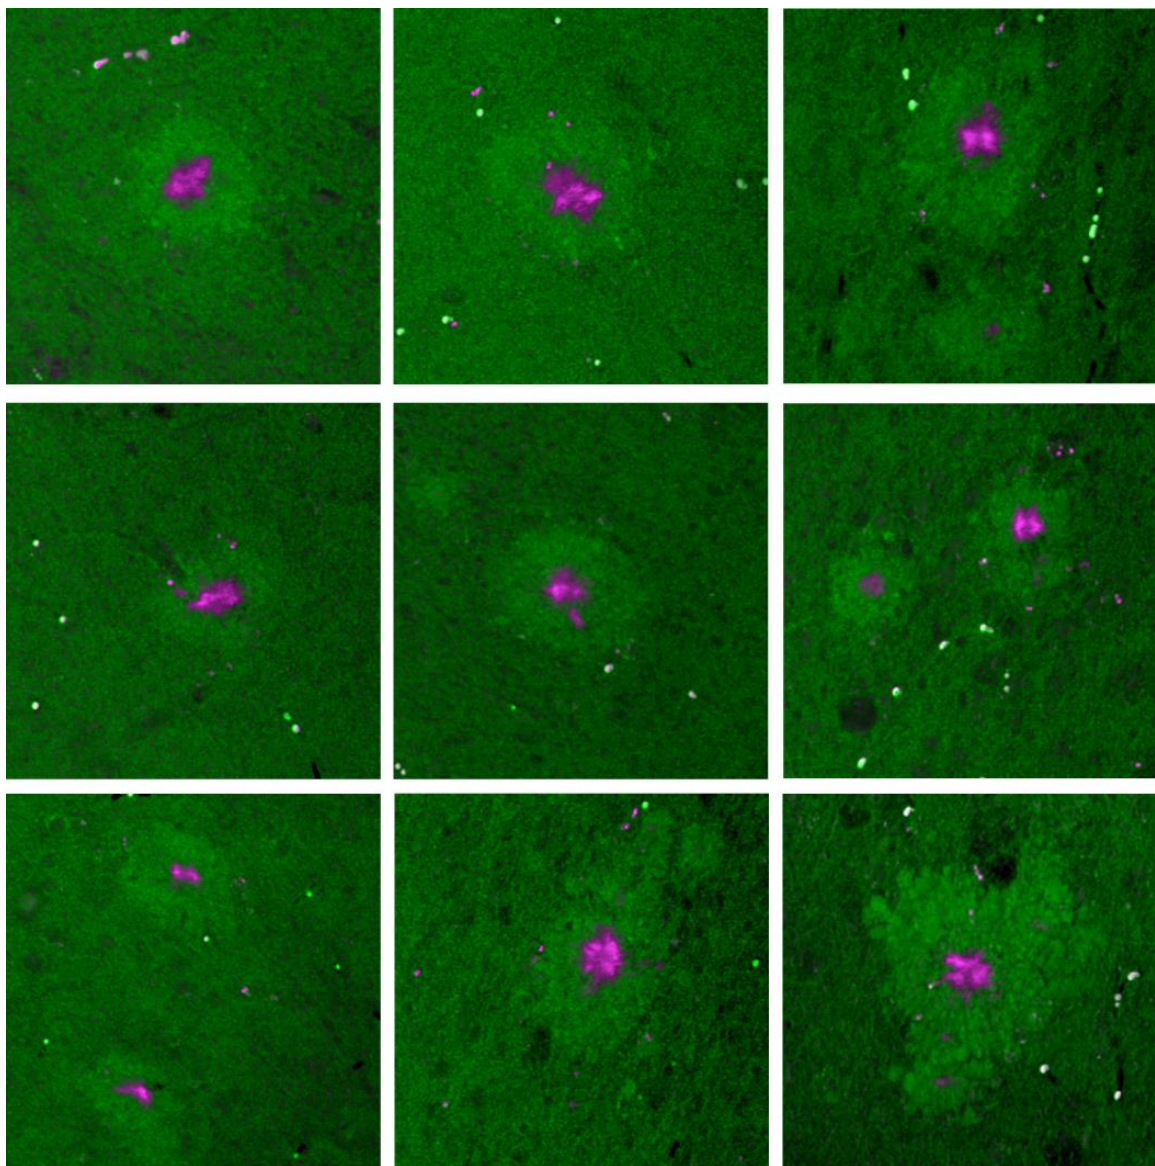

**Fig. S3. More SRS images of SPs in fresh brain tissues.** Each plaque could be seen with surrounding “halo” structures. The chemical compositions of these “halos” is analyzed in the text and Fig. S4.

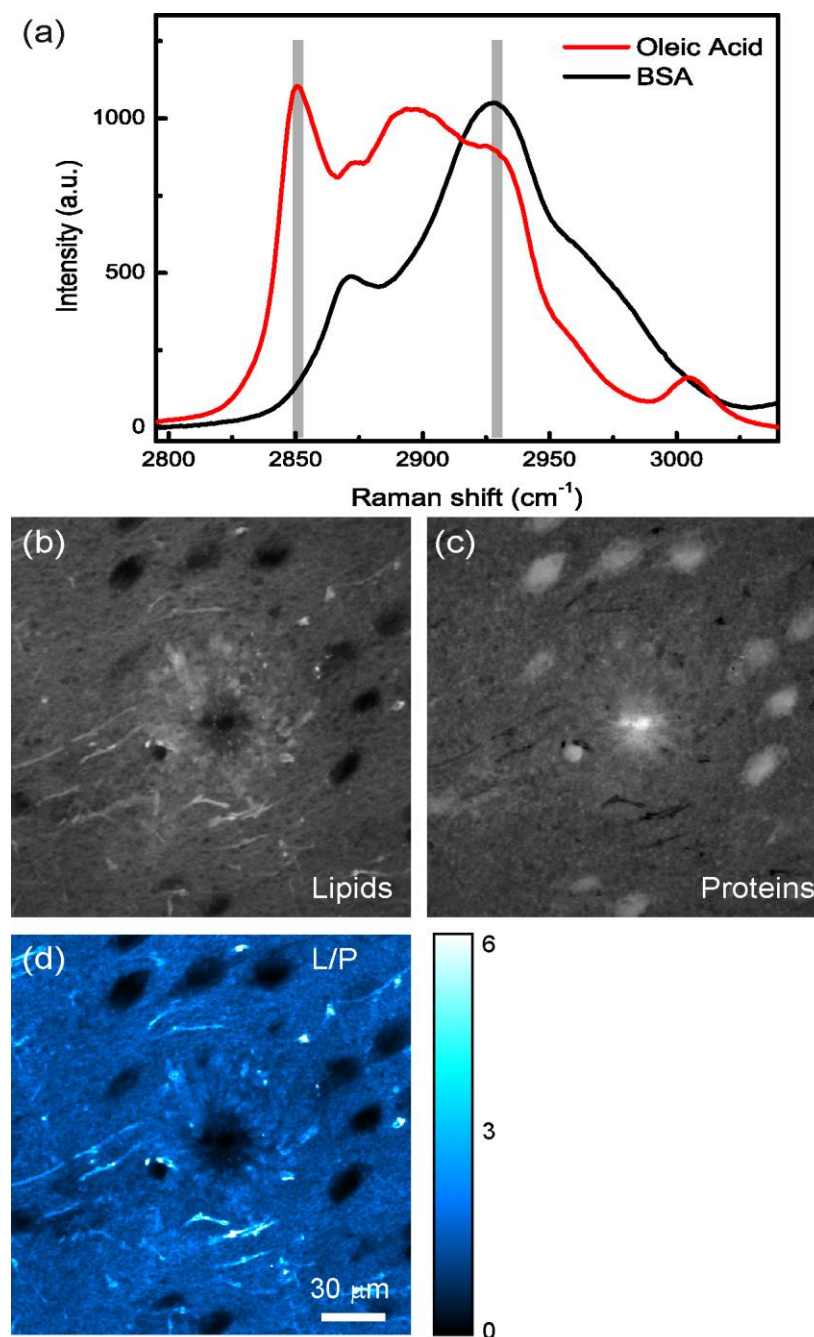

**Fig. S4. Lipid/protein analysis of the plaque and surrounding tissue.** (A) Spontaneous Raman spectra of standard lipid (oleic acid) and protein (BSA). Decomposed lipids (B) and proteins (C) distribution of the same tissue imaged in Figure 6. (D) Lipid/protein ratio mapping of the tissue. We can see that the core of the plaque is mostly protein, and the “halo” region has higher concentration of lipids than the surrounding normal tissues.
